# Supplementary material for: A Phase 1 Study of KHK4083: A Single‐Blind, Randomized, Placebo‐Controlled Single‐Ascending‐Dose Study in Healthy Adults and an Open‐Label Multiple‐Dose Study in Patients With Ulcerative Colitis
Source: PubMed Central journal article supplement (PMC8451804; doi:10.1002/cpdd.918), 2021-01-29

|                                                    |          |                     |
|----------------------------------------------------|----------|---------------------|
| <u>SCREENING</u><br>Max 4 weeks<br>(Max 28 days)   | VISIT 1  | Day -28             |
|                                                    |          | Day -2              |
|                                                    | VISIT 2  | Day -1              |
|                                                    |          | Day 1 (Week 0)      |
|                                                    |          | Day 4 or 5 (Week 0) |
|                                                    | VISIT 3  | Day 8 (Week 1)      |
|                                                    | VISIT 4  | Day 15 (Week 2)     |
|                                                    | VISIT 5  | Day 29 (Week 4)     |
|                                                    | VISIT 6  | Day 43 (Week 6)     |
|                                                    | VISIT 7  | Day 57 (Week 8)     |
|                                                    | VISIT 8  | Day 71 (Week 10)    |
|                                                    | VISIT 9  | Day 85 (Week 12)    |
|                                                    | VISIT 10 | Day 99 (Week 14)    |
|                                                    | VISIT 11 | Day 113 (Week 16)   |
|                                                    | VISIT 12 | Day 127 (Week 18)   |
| <u>TREATMENT</u><br>Max 18 weeks<br>(Max 126 days) |          |                     |

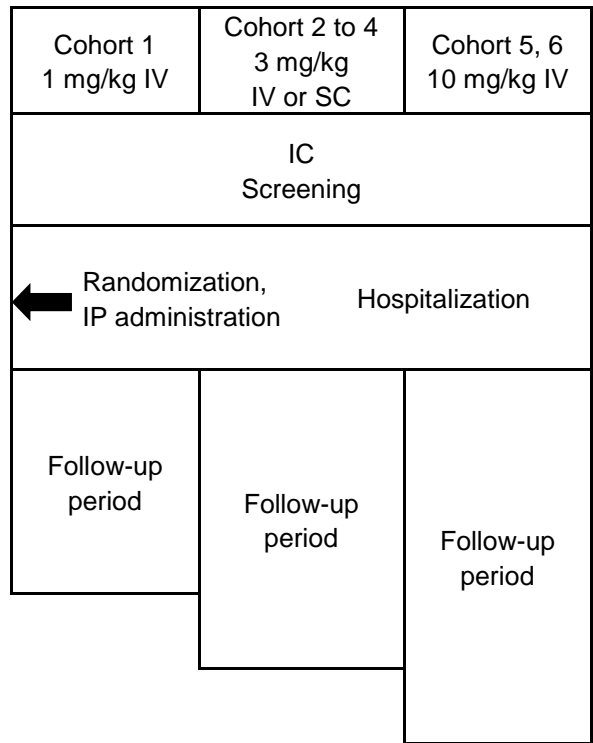

Supplement: CPDD-10-870-s002.pdf [file CPDD-10-870-s002.pdf]
