# Supplementary material for: A Phase 1 Study of KHK4083: A Single‐Blind, Randomized, Placebo‐Controlled Single‐Ascending‐Dose Study in Healthy Adults and an Open‐Label Multiple‐Dose Study in Patients With Ulcerative Colitis
Source: PubMed Central journal article supplement (PMC8451804; doi:10.1002/cpdd.918), 2021-01-29

|                                                  |
|--------------------------------------------------|
| <u>SCREENING</u><br>Max 4 weeks<br>(Max 28 days) |
| <u>TREATMENT</u><br>22 weeks<br>(155 days)       |

|         |                   |
|---------|-------------------|
| VISIT 1 | Day -28           |
|         | Day -1            |
| VISIT 2 | Day 1 (Week 0)    |
| VISIT 3 | Day 15 (Week 2)   |
| VISIT 4 | Day 29 (Week 4)   |
| VISIT 5 | Day 43 (Week 6)   |
| VISIT 6 | Day 71 (Week 10)  |
| VISIT 7 | Day 99 (Week 14)  |
| VISIT 8 | Day 127 (Week 18) |
| VISIT 9 | Day 155 (Week 22) |

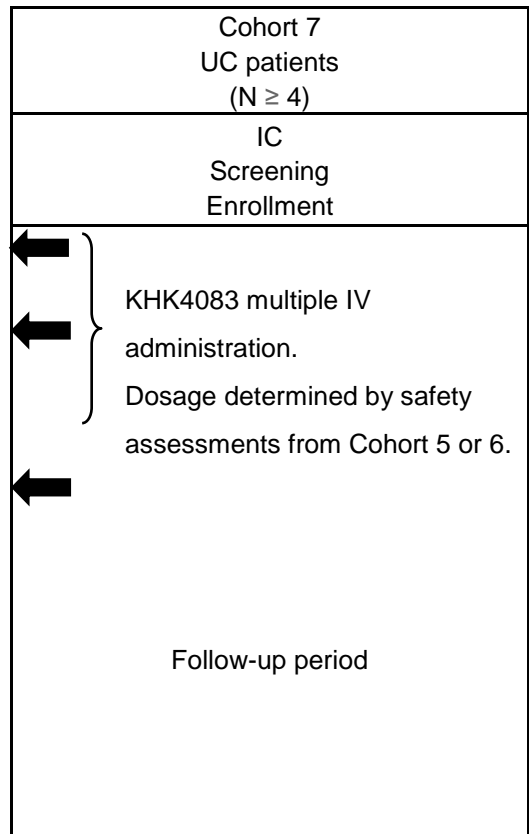

Supplement: CPDD-10-870-s003.pdf [file CPDD-10-870-s003.pdf]
